# Supplementary material for: Molecular and Morphological Assessment of Septoria Species Associated with Ornamental Plants in Yunnan Province, China
Source: MDPI journal article supplement (doi:10.3390/jof7060483), 2021-06-16
Supplement: s1 [file s1]

**Supl. Table S1.** DNA base difference between our *Septoria* strains and related species.

| Species                   | Strain number | TEF (1-393bp) | RPB2 (394-736bp) | TUB (737-1049bp) | ITS (1050-1530bp) | LSU (1531-2329bp) |
|---------------------------|---------------|---------------|------------------|------------------|-------------------|-------------------|
| <i>S. sanguisorbigena</i> | GUCC 2131.2   | 0             | 0                | 0                | 2                 | 0                 |
| <i>S. sanguisorbigena</i> | GUCC 2164.1   | 0             | 0                | 0                | 2                 | 0                 |
| <i>S. sanguisorbigena</i> | GUCC 2164.2 T | 0             | 0                | 0                | 0                 | 0                 |
| <i>S. posoniensis</i>     | CBS 128645    | 4             | 7                | 7                | 0                 | 0                 |
| <i>S. exotica</i>         | CBS 163.78    | 6             | 2                | 6                | 2                 | 0                 |
| <i>S. chrysanthemella</i> | CBS 128716    | 21            | 13               | 13               | 2                 | 3                 |
| Species                   | Strain number | TEF (1-393bp) | RPB2 (394-736bp) | TUB (737-1049bp) | ITS (1050-1533bp) | LSU (1534-2332bp) |
| <i>S. pileicola</i>       | GUCC 2131.3   | 0             | 0                | 0                | 1                 | 0                 |
| <i>S. pileicola</i>       | GUCC 2131.4 T | 0             | 0                | 0                | 0                 | 0                 |
| <i>S. posoniensis</i>     | CBS 128645    | 4             | 8                | 0                | 3                 | 0                 |
| <i>S. exotica</i>         | CBS 163.78    | 6             | 3                | 9                | 3                 | 0                 |
| <i>S. chrysanthemella</i> | CBS 128716    | 20            | 14               | 16               | 3                 | 3                 |
| <i>S. sanguisorbigena</i> | GUCC 2164.2 T | 0             | 1                | 7                | 1                 | 0                 |
| Species                   | Strain number | TEF (1-393bp) | RPB2 (394-736bp) | TUB (737-1049bp) | ITS (1050-1530bp) | LSU (1531-2329bp) |
| <i>S. longipes</i>        | GUCC 2131.1 T | /             | 0                | 0                | 0                 | 0                 |
| <i>S. posoniensis</i>     | CBS 128645    | /             | 5                | 8                | 2                 | 0                 |
| <i>S. exotica</i>         | CBS 163.78    | /             | 5                | 7                | 2                 | 0                 |
| <i>S. chrysanthemella</i> | CBS 128716    | /             | 14               | 14               | 2                 | 3                 |

| Species               | Strain number | TEF (1-387bp) | RPB2 (388-727bp) | TUB (728-1038bp) | ITS (1039-1493bp) | LSU (1494-2292bp)  |
|-----------------------|---------------|---------------|------------------|------------------|-------------------|--------------------|
| <i>S. protearum</i>   | GUCC 2127.3   | 0             | 0                | 0                | 0                 | 0                  |
| <i>S. protearum</i>   | CBS 778.97 T  | 0             | 0                | 0                | 0                 | 0                  |
| Species               | Strain number | TEF (1-393bp) | RPB2 (394-736bp) | TUB (737-1046bp) | ITS (1047-1540bp) | LSU (1541-2339bp)  |
| <i>S. dispori</i>     | GUCC 2164.3   | 0             | 0                | 0                | 0                 | 0                  |
| <i>S. dispori</i>     | GUCC 2164.4   | 0             | 0                | 0                | 0                 | 0                  |
| <i>S. dispori</i>     | GUCC 2127.1 T | 0             | 3                | 0                | 4                 | 0                  |
| <i>S. verbenae</i>    | CBS 113438    | 54            | 15               | 23               | 0                 | 6                  |
| <i>S. coprosmae</i>   | CBS 113391    | 43            | 43               | 23               | 1                 | 0                  |
| Species               | Strain number | TEF (1-393bp) | RPB2 (394-736bp) | TUB (737-1046bp) | ITS (1047-1501bp) | LSU (15015-2300bp) |
| <i>S. dispori</i>     | GUCC 2127.4   | 0             | 0                | 0                | 0                 | 0                  |
| <i>S. verbenae</i>    | CBS 113438    | 54            | 16               | 25               | 0                 | 6                  |
| <i>S. coprosmae</i>   | CBS 113391    | 43            | 43               | 16               | 0                 | 0                  |
| <i>S. dispori</i>     | GUCC 2164.3 T | 0             | 1                | 11               | 0                 | 0                  |
| Species               | Strain number | TEF (1-388bp) | RPB2 (389-732bp) | TUB (733-1041bp) | ITS (1042-1526bp) | LSU (1527-2325bp)  |
| <i>S. protearum</i>   | CBS 778.97 T  | 0             | 0                | 0                | 0                 | 0                  |
| <i>S. critri</i>      | CBS 315.37    | 1             | 0                | /                | 0                 | 0                  |
| <i>S. critica</i>     | CBS 356.36 T  | 1             | 1                | 0                | 0                 | 0                  |
| <i>S. limonum</i>     | CBS 419.51    | 1             | 0                | 0                | 0                 | 0                  |
| <i>S. chamaecisti</i> | CBS 350.58    | 0             | 0                | 1                | 0                 | 0                  |

---

|                    |        |   |    |   |   |   |
|--------------------|--------|---|----|---|---|---|
| <i>S. gerberae</i> | CBS    | 0 | 11 | 0 | 1 | 0 |
|                    | 410.61 |   |    |   |   |   |
| <i>S. hederæ</i>   | CBS    | 0 | 10 | 0 | 0 | 0 |
|                    | 566.88 |   |    |   |   |   |
| <i>S. lobeliae</i> | CBS    | 0 | 9  | 0 | 1 | 0 |
|                    | 113392 |   |    |   |   |   |

---
